# Supplementary material
Source: PubMed Central journal article supplement (PMC6439683)
Supplement: jamacardiol-4-7-s001.pdf [file jamacardiol-4-7-s001.pdf]

## Supplementary Online Content

Olivier CB, Mulder H, Hiatt WR, et al. Incidence, characteristics, and outcomes of myocardial infarction in patients with peripheral artery disease: insights from the EUCLID trial. *JAMA Cardiol*. Published online December 12, 2018. doi:10.1001/jamacardio.2018.4171

**eMethods.** Definition of myocardial infarction (MI)

**eTable 1.** Adjustment variables for risk of cardiovascular death and acute limb ischemia following myocardial infarction

**eTable 2.** Baseline characteristics of patients included by region

**eTable 3.** Incidence rates of myocardial infarction by region

**eTable 4.** Electrocardiography characteristics of the first myocardial infarction during follow-up

This supplementary material has been provided by the authors to give readers additional information about their work.

## eMethods. Definition of myocardial infarction (MI)

For a spontaneous MI, detection of rise and/or fall of cardiac biomarkers, preferably troponin, with at least one value above the 99th percentile if available or the upper reference limit (URL) from the local lab, together with evidence of myocardial ischemia with at least one of the following:

- Clinical presentation consistent with ischemia
- ECG evidence of acute myocardial ischemia
- New pathological Q-waves
- Autopsy evidence of acute MI
- Sudden unexpected cardiac death, involving cardiac arrest, often with symptoms suggestive of myocardial ischemia, and accompanied by presumably new ST-elevation or new LBBB, and/or evidence of fresh thrombus by coronary angiography and/or autopsy, but death occurring before blood samples could be obtained, or at a time before the appearance of cardiac biomarkers in the blood.
- Percutaneous Coronary Intervention-Related Myocardial Infarction: Peri-PCI MI is defined by any of the following criteria. Symptoms of cardiac ischemia are not required.
  1. Biomarker elevations within 48 hours of PCI:
    - Troponin or CK-MB (preferred)  $>3 \times$  URL **and**
    - No evidence that cardiac biomarkers were elevated prior to the procedure; **OR**Both of the following must be true:
    - $\geq 50\%$  increase in the cardiac biomarker result
    - Evidence that cardiac biomarker values were decreasing (e.g., two samples 3 to 6 hours apart) prior to the suspected MI
  2. New pathological Q-waves
  3. Autopsy evidence of acute MI
- Coronary Artery Bypass Grafting-Related Myocardial Infarction: Peri- CABG MI is defined by the following criteria. Symptoms of cardiac ischemia are not required.
  1. Biomarker elevations within 72 hours of CABG:
    - Troponin or CK-MB (preferred)  $>5 \times$  URL **and**
    - No evidence that cardiac biomarkers were elevated prior to the procedure; **OR**Both of the following must be true:
    - $\geq 50\%$  increase in the cardiac biomarker result
    - Evidence that cardiac biomarker values were decreasing (e.g., two samples 3 to 6 hours apart) prior to the suspected MI.AND
  2. One of the following:
    - New pathological Q-waves persistent through 30 days
    - New persistent non-rate-related LBBB
    - Angiographically documented new graft or native coronary artery occlusion
    - Other complication in the operating room resulting in loss of myocardium
    - Imaging evidence of new loss of viable myocardiumOR (regardless of items 1 and 2 above)
  3. Autopsy evidence of acute MI

**eTable 1.** Adjustment variables for risk of cardiovascular death and acute limb ischemia following myocardial infarction

| <b>MI type</b> | <b>CV death</b>                                                                                                                                                                                                                                                                                 | <b>ALI</b>                                                                                                                                                                                                                                                               |
|----------------|-------------------------------------------------------------------------------------------------------------------------------------------------------------------------------------------------------------------------------------------------------------------------------------------------|--------------------------------------------------------------------------------------------------------------------------------------------------------------------------------------------------------------------------------------------------------------------------|
| <b>Any</b>     | region, age, diabetes, prior PCI, prior MI, inclusion criteria, prior carotid revascularization or stenosis, baseline Rutherford score, prior minor amputation, beta blocker use, prior CHF, prior TIA, prior CABG, tobacco use, sex, prior statin use, prior stroke and prior major amputation | region, age, diabetes, prior PCI, prior MI, inclusion criteria, prior carotid revascularization or stenosis, baseline Rutherford score, prior minor amputation, beta blocker use, prior CHF, prior TIA, prior CABG, tobacco use, sex, prior statin use, and baseline ABI |
| <b>Type 1</b>  | diabetes, prior MI, region, prior PCI, prior carotid revascularization/stenosis, baseline Rutherford score, inclusion criteria, prior CHF, prior TIA, prior stroke, prior statin use, and prior major amputation                                                                                | diabetes, prior MI, region, prior PCI, prior carotid revascularization/stenosis, baseline Rutherford score, inclusion criteria, prior CHF, prior TIA, prior statin use and baseline ABI                                                                                  |
| <b>Type 2</b>  | age, sex, weight, diabetes, region, prior PCI, prior carotid revascularization/stenosis, baseline Rutherford score, inclusion criteria, prior CHF, beta blocker use, prior TIA, prior statin use, prior stroke, and prior major amputation                                                      | age, sex, weight, diabetes, region, prior PCI, prior carotid revascularization/stenosis, baseline Rutherford score, inclusion criteria, prior CHF, beta blocker use, prior TIA, prior statin use, and baseline ABI                                                       |

ABI, ankle-brachial index; CABG, coronary artery bypass grafting; CHF, congestive heart failure; MI, myocardial infarction; PCI, percutaneous coronary intervention; TIA, transient ischemic attack.

**eTable 2.** Baseline characteristics of patients included by region

| <b>Characteristic</b>                             | <b>South/Central America (N=1740)</b> | <b>Asia (N=1602)</b> | <b>Europe (N=7498)</b> | <b>North America (N=3045)</b> |
|---------------------------------------------------|---------------------------------------|----------------------|------------------------|-------------------------------|
| Age, years, median (25th, 75th)                   | 67, 61-74                             | 70, 63-75            | 65, 59-71              | 67, 61-73                     |
| Female sex                                        | 664 (38.2%)                           | 330 (20.6%)          | 1828 (24.4%)           | 1066 (35.0%)                  |
| Weight, kg, median (25th, 75th)                   | 74, 65-84                             | 62, 54-70            | 79, 70-89              | 82, 70-94                     |
| <b>Inclusion Criteria for Randomization</b>       |                                       |                      |                        |                               |
| Previous revascularization                        | 591 (34.0%)                           | 1162 (72.5%)         | 3872 (51.6%)           | 2250 (73.9%)                  |
| ABI value, mean (SD)                              | 0.70, (0.23)                          | 0.81, (0.25)         | 0.76, (0.23)           | 0.82, (0.21)                  |
| ABI or TBI criteria                               | 1149 (66.0%)                          | 440 (27.5%)          | 3626 (48.4%)           | 795 (26.1%)                   |
| ABI value, mean (SD)                              | 0.66, (0.20)                          | 0.62, (0.15)         | 0.62, (0.14)           | 0.64, (0.12)                  |
| TBI value, mean (SD)                              | 0.57, (0.22)                          | 0.46, (0.12)         | 0.49, (0.22)           | 0.44, (0.16)                  |
| <b>Limb symptoms by Rutherford classification</b> |                                       |                      |                        |                               |
| Asymptomatic                                      | 128 (7.4%)                            | 553 (34.5%)          | 1311 (17.5%)           | 609 (20.0%)                   |
| Mild or moderate claudication                     | 998 (57.4%)                           | 730 (45.6%)          | 4053 (54.1%)           | 1629 (53.5%)                  |
| Severe claudication                               | 508 (29.2%)                           | 212 (13.2%)          | 1818 (24.3%)           | 690 (22.7%)                   |
| Pain while at rest                                | 51 (2.9%)                             | 42 (2.6%)            | 188 (2.5%)             | 97 (3.2%)                     |
| Minor tissue loss                                 | 44 (2.5%)                             | 48 (3.0%)            | 99 (1.3%)              | 16 (0.5%)                     |
| Major tissue loss                                 | 11 (0.6%)                             | 17 (1.1%)            | 26 (0.3%)              | 4 (0.1%)                      |
| Major amputation above the ankle                  | 108 (6.3%)                            | 45 (2.8%)            | 137 (1.8%)             | 49 (1.6%)                     |
| Minor amputation                                  | 175 (10.1%)                           | 82 (5.1%)            | 272 (3.6%)             | 76 (2.5%)                     |
| <b>Medical History</b>                            |                                       |                      |                        |                               |
| <b>Number of vascular beds affected</b>           |                                       |                      |                        |                               |
| 1                                                 | 1131 (65.0%)                          | 1002 (62.5%)         | 4525 (60.3%)           | 1146 (37.6%)                  |
| 2                                                 | 518 (29.8%)                           | 493 (30.8%)          | 2386 (31.8%)           | 1291 (42.4%)                  |
| 3                                                 | 91 (5.2%)                             | 107 (6.7%)           | 587 (7.8%)             | 608 (20.0%)                   |
| Prior stroke                                      | 126 (7.2%)                            | 258 (16.1%)          | 550 (7.3%)             | 209 (6.9%)                    |
| Prior TIA                                         | 42 (2.4%)                             | 62 (3.9%)            | 212 (2.8%)             | 191 (6.3%)                    |
| Prior CAD                                         | 449 (25.8%)                           | 308 (19.2%)          | 1838 (24.5%)           | 1437 (47.2%)                  |
| Prior MI                                          | 319 (18.3%)                           | 158 (9.9%)           | 1283 (17.1%)           | 762 (25.0%)                   |
| Prior PCI                                         | 221 (12.7%)                           | 212 (13.2%)          | 839 (11.2%)            | 901 (29.6%)                   |
| Prior CABG                                        | 141 (8.1%)                            | 76 (4.7%)            | 614 (8.2%)             | 705 (23.2%)                   |
| Prior carotid stenosis/ revascularization         | 122 (7.0%)                            | 182 (11.4%)          | 1326 (17.7%)           | 897 (29.5%)                   |
| Prior atrial fibrillation/flutter                 | 26 (1.5%)                             | 44 (2.7%)            | 267 (3.6%)             | 159 (5.2%)                    |
| Prior CHF                                         | 130 (7.5%)                            | 73 (4.6%)            | 1385 (18.5%)           | 340 (11.2%)                   |
| <b>CCS angina class</b>                           |                                       |                      |                        |                               |
| 0                                                 | 1606 (92.3%)                          | 1461 (91.2%)         | 6194 (82.6%)           | 2758 (90.6%)                  |
| I                                                 | 72 (4.1%)                             | 89 (5.6%)            | 587 (7.8%)             | 177 (5.8%)                    |
| II                                                | 49 (2.8%)                             | 39 (2.4%)            | 567 (7.6%)             | 86 (2.8%)                     |
| III                                               | 11 (0.6%)                             | 13 (0.8%)            | 140 (1.9%)             | 21 (0.7%)                     |
| IV                                                | 2 (0.1%)                              | 0 (0.0%)             | 8 (0.1%)               | 3 (0.1%)                      |
| Chronic Kidney Disease                            | 560 (32.9%)                           | 468 (29.6%)          | 1381 (19.2%)           | 896 (30.2%)                   |
| Family history of CHD                             | 170 (12.9%)                           | 56 (4.6%)            | 822 (16.4%)            | 962 (36.9%)                   |
| Diabetes mellitus type 1 or 2                     | 989 (56.8%)                           | 689 (43.0%)          | 2447 (32.6%)           | 1220 (40.1%)                  |
| Hypertension                                      | 1350 (77.6%)                          | 1123 (70.1%)         | 5757 (76.8%)           | 2627 (86.3%)                  |
| Hyperlipidemia                                    | 1232 (70.8%)                          | 883 (55.1%)          | 5551 (74.1%)           | 2814 (92.4%)                  |
| <b>Tobacco Use</b>                                |                                       |                      |                        |                               |
| Never smoker                                      | 554 (31.8%)                           | 385 (24.0%)          | 1693 (22.8%)           | 352 (11.6%)                   |

| <b>Characteristic</b>                       | <b>South/Central<br/>America<br/>(N=1740)</b> | <b>Asia<br/>(N=1602)</b> | <b>Europe<br/>(N=7498)</b> | <b>North<br/>America<br/>(N=3045)</b> |
|---------------------------------------------|-----------------------------------------------|--------------------------|----------------------------|---------------------------------------|
| Former smoker                               | 801 (46.0%)                                   | 844 (52.7%)              | 3221 (43.4%)               | 1664 (54.6%)                          |
| Current smoker                              | 385 (22.1%)                                   | 373 (23.3%)              | 2502 (33.7%)               | 1029 (33.8%)                          |
| <b>Medications Before<br/>Randomization</b> |                                               |                          |                            |                                       |
| Aspirin                                     | 1089 (62.6%)                                  | 905 (56.5%)              | 4950 (66.0%)               | 2327 (76.4%)                          |
| Clopidogrel                                 | 217 (12.5%)                                   | 551 (34.4%)              | 2166 (28.9%)               | 1539 (50.5%)                          |
| Statin                                      | 1134 (65.2%)                                  | 1012 (63.2%)             | 5463 (72.9%)               | 2572 (84.5%)                          |
| ACE inhibitor                               | 706 (40.6%)                                   | 205 (12.8%)              | 3343 (44.6%)               | 1381 (45.4%)                          |
| Angiotensin receptor blocker                | 526 (30.2%)                                   | 583 (36.4%)              | 1654 (22.1%)               | 725 (23.8%)                           |
| Beta-blocker                                | 691 (39.7%)                                   | 760 (47.4%)              | 252 (3.4%)                 | 392 (12.9%)                           |
| Cilostazol                                  | 614 (35.3%)                                   | 369 (23.0%)              | 2953 (39.4%)               | 1704 (56.0%)                          |

Values are no. (%), unless otherwise indicated. Chronic kidney disease was defined as an estimated glomerular filtration rate of <60 ml/min/1.73m<sup>2</sup>.

ABI, ankle-brachial index; ACE, angiotensin-converting enzyme; CABG, coronary artery bypass graft; CAD, coronary artery disease; CCS, Canadian Cardiovascular Society; CHD, coronary heart disease; CHF, congestive heart failure; CI, confidence interval; HR, hazard ratio; MI, myocardial Infarction; PCI, percutaneous coronary intervention; SD, standard deviation; TBI, toe-brachial index; TIA, transient ischemic attack.

**eTable 3.** Incidence rates of myocardial infarction by region

| <b>Outcome</b> | <b>Asia<br/>Rate (# Events)</b> | <b>Central/South<br/>America<br/>Rate (# Events)</b> | <b>Europe<br/>Rate (# Events)</b> | <b>North America<br/>Rate (# Events)</b> |
|----------------|---------------------------------|------------------------------------------------------|-----------------------------------|------------------------------------------|
| MI             | 1.87 (71)                       | 0.66 (26)                                            | 1.59 (294)                        | 3.96 (292)                               |
| Type 1 MI      | 1.23 (47)                       | 0.46 (18)                                            | 1.01 (188)                        | 2.17 (162)                               |
| Type 2 MI      | 0.70 (27)                       | 0.15 (6)                                             | 0.53 (99)                         | 1.79 (135)                               |

The median follow-up time was 30 months. Rate calculated as the number of events per 100 patient years of follow-up.

**eTable 4.** Electrocardiography characteristics of the first myocardial infarction during follow-up

| Characteristic                     |       | Any type     | Type 1 MI    | Type 2 MI    |
|------------------------------------|-------|--------------|--------------|--------------|
| <b>STEMI vs. NSTEMI</b>            |       | <b>N=683</b> | <b>N=405</b> | <b>N=236</b> |
| STEMI                              |       | 63 (9%)      | 54 (13%)     | 1 (<1%)      |
| NSTEMI                             |       | 522 (76%)    | 312 (77%)    | 194 (82%)    |
| Unknown                            |       | 98 (14%)     | 39 (10%)     | 41 (17%)     |
| <b>New Q-Wave*</b>                 |       | <b>N=413</b> | <b>N=294</b> | <b>N=91</b>  |
| Yes                                |       | 22 (5%)      | 17 (6%)      | 3 (3%)       |
| No                                 |       | 325 (79%)    | 238 (81%)    | 71 (78%)     |
| No ECG available                   |       | 66 (16%)     | 39 (13%)     | 17 (19%)     |
| <b>Peak Troponin I/T Elevation</b> |       | <b>N=683</b> | <b>N=405</b> | <b>N=236</b> |
| ≤1                                 | x ULN | 2 (<1%)      | 0 (0%)       | 2 (<1%)      |
| >1-3                               |       | 144 (21%)    | 66 (16%)     | 76 (32%)     |
| >3-5                               |       | 51 (7%)      | 21 (5%)      | 28 (12%)     |
| >5-10                              |       | 79 (12%)     | 36 (9%)      | 41 (17%)     |
| >10                                |       | 312 (46%)    | 221 (55%)    | 70 (30%)     |
| Missing†                           |       | 95 (14%)     | 61 (15%)     | 19 (8%)      |

\*Q-wave status was assessed by the site investigator only.

†Ratio not calculated due to missing values for the ULN or peak level elevation of troponin I/T.

Values are n (%).

ECG, electrocardiogram; NSTEMI, non-ST-elevation MI; STEMI, ST-elevation MI; ULN, upper limit of normal; others as in Table 1.
